# Supplementary material for: Trends in Colon and Rectal Cancer Incidence in Australia from 1982 to 2014: Analysis of Data on Over 375,000 Cases
Source: Oxford University Press journal article supplement (doi:10.1158/1055-9965.epi-18-0523), 2018-12-07
Supplement: 10559965epi180523-sup-201718_2_supp_5081810_pg9k41.docx [file 10559965epi180523-sup-201718_2_supp_5081810_pg9k41.docx]

Rectal cancer age-specific incidence rates by year (1982-2014)

|  | 20-29 y | 30-39 y | 40-49 y | 50-59 y | 60-69 y | 70-74 y | 75-79 y | 80-84 y | 85+ y |
| --- | --- | --- | --- | --- | --- | --- | --- | --- | --- |
| 1982 | 0.23 | 1.87 | 8.55 | 32.73 | 60.98 | 99.51 | 98.95 | 127.62 | 131.84 |
| 1983 | 0.38 | 1.76 | 11.64 | 29.48 | 59.86 | 83.86 | 115.68 | 113.81 | 120.79 |
| 1984 | 0.30 | 1.89 | 9.48 | 33.22 | 63.41 | 82.86 | 99.74 | 101.70 | 124.31 |
| 1985 | 0.37 | 1.29 | 10.02 | 33.18 | 63.91 | 89.37 | 107.31 | 105.69 | 103.94 |
| 1986 | 0.19 | 1.54 | 10.45 | 31.43 | 58.93 | 84.32 | 95.86 | 119.44 | 105.96 |
| 1987 | 0.37 | 2.27 | 9.31 | 33.73 | 64.08 | 82.90 | 97.46 | 104.56 | 120.65 |
| 1988 | 0.15 | 2.46 | 9.36 | 33.64 | 63.05 | 94.55 | 100.56 | 105.01 | 105.30 |
| 1989 | 0.40 | 1.88 | 8.87 | 31.69 | 64.76 | 101.46 | 102.86 | 111.44 | 134.09 |
| 1990 | 0.14 | 1.92 | 8.97 | 34.32 | 65.46 | 94.16 | 109.80 | 124.03 | 122.30 |
| 1991 | 0.46 | 2.00 | 8.44 | 36.11 | 69.02 | 101.22 | 116.78 | 126.62 | 103.08 |
| 1992 | 0.18 | 1.75 | 8.65 | 37.34 | 72.97 | 97.49 | 110.79 | 123.52 | 119.83 |
| 1993 | 0.25 | 1.70 | 11.03 | 33.72 | 73.63 | 98.71 | 108.48 | 113.90 | 115.83 |
| 1994 | 0.25 | 2.21 | 9.32 | 36.89 | 78.28 | 101.12 | 120.49 | 114.32 | 114.28 |
| 1995 | 0.29 | 2.16 | 9.62 | 35.53 | 78.90 | 102.76 | 123.81 | 113.13 | 115.55 |
| 1996 | 0.25 | 2.32 | 9.55 | 36.38 | 74.30 | 109.30 | 118.20 | 120.25 | 127.42 |
| 1997 | 0.43 | 2.18 | 9.70 | 35.65 | 78.15 | 102.90 | 117.53 | 120.17 | 117.80 |
| 1998 | 0.43 | 2.31 | 9.43 | 32.96 | 79.03 | 106.34 | 109.87 | 111.26 | 104.57 |
| 1999 | 0.55 | 2.13 | 9.44 | 32.20 | 74.56 | 106.22 | 124.87 | 126.89 | 115.77 |
| 2000 | 0.37 | 2.47 | 10.56 | 34.07 | 73.70 | 113.63 | 131.32 | 124.42 | 109.91 |
| 2001 | 0.48 | 2.62 | 10.60 | 32.78 | 73.48 | 105.35 | 133.76 | 139.71 | 114.64 |
| 2002 | 0.37 | 2.87 | 8.99 | 33.05 | 73.79 | 108.69 | 115.79 | 134.14 | 115.21 |
| 2003 | 0.63 | 3.01 | 10.59 | 32.44 | 77.89 | 100.45 | 121.91 | 115.26 | 106.63 |
| 2004 | 0.84 | 2.47 | 9.75 | 33.92 | 74.51 | 105.36 | 115.84 | 124.85 | 95.36 |
| 2005 | 0.47 | 2.86 | 9.70 | 33.35 | 73.54 | 101.11 | 118.97 | 115.85 | 102.92 |
| 2006 | 0.67 | 2.75 | 10.55 | 34.96 | 70.78 | 106.55 | 118.17 | 117.08 | 114.53 |
| 2007 | 0.69 | 3.39 | 10.05 | 36.43 | 78.08 | 101.99 | 111.01 | 122.91 | 116.27 |
| 2008 | 0.63 | 2.66 | 10.07 | 35.63 | 71.11 | 100.93 | 103.30 | 114.82 | 97.29 |
| 2009 | 0.82 | 3.47 | 11.51 | 32.28 | 66.47 | 93.05 | 114.32 | 104.76 | 100.48 |
| 2010 | 1.02 | 3.13 | 11.09 | 32.90 | 69.34 | 99.02 | 110.40 | 112.59 | 102.69 |
| 2011 | 0.86 | 3.54 | 12.50 | 31.70 | 61.64 | 104.31 | 110.33 | 110.13 | 102.33 |
| 2012 | 0.99 | 4.07 | 10.20 | 28.79 | 59.36 | 84.61 | 104.06 | 105.22 | 97.55 |
| 2013 | 1.01 | 3.37 | 11.68 | 29.00 | 61.40 | 86.72 | 102.21 | 100.63 | 93.98 |
