# Supplementary material for: Trends in Colon and Rectal Cancer Incidence in Australia from 1982 to 2014: Analysis of Data on Over 375,000 Cases
Source: Oxford University Press journal article supplement (doi:10.1158/1055-9965.epi-18-0523), 2018-12-07
Supplement: 10559965epi180523-sup-201718_2_supp_5081813_pg9k41.docx [file 10559965epi180523-sup-201718_2_supp_5081813_pg9k41.docx]

Colon cancer age-specific incidence rates by year (1982-2014)

|  | 20-29 y | 30-39 y | 40-49 y | 50-54 y | 55-59 y | 60-64 y | 65-69 y | 70-74 y | 75-79 y | 80-84 y | 85+ y |
| --- | --- | --- | --- | --- | --- | --- | --- | --- | --- | --- | --- |
| 1982 | 1.1 | 4.4 | 19.1 | 41.5 | 61.9 | 93.5 | 118.6 | 176.1 | 224.4 | 263.4 | 296.6 |
| 1983 | 0.9 | 4.4 | 19.2 | 42.7 | 60.4 | 95.6 | 129.3 | 177.6 | 222.6 | 262.5 | 298.3 |
| 1984 | 0.7 | 4.3 | 18.0 | 43.3 | 66.8 | 97.7 | 134.7 | 173.9 | 237.9 | 291.3 | 295.4 |
| 1985 | 0.9 | 4.2 | 19.6 | 49.7 | 71.3 | 98.4 | 143.7 | 194.0 | 238.1 | 282.4 | 336.6 |
| 1986 | 1.1 | 4.5 | 17.5 | 47.0 | 72.4 | 108.3 | 139.6 | 179.0 | 242.0 | 294.6 | 297.0 |
| 1987 | 1.4 | 4.1 | 17.4 | 47.6 | 74.6 | 98.8 | 136.1 | 187.5 | 233.8 | 280.7 | 297.5 |
| 1988 | 1.0 | 3.6 | 15.7 | 41.7 | 65.8 | 103.1 | 137.1 | 174.9 | 240.4 | 268.2 | 292.7 |
| 1989 | 0.7 | 3.7 | 14.5 | 40.7 | 74.2 | 108.8 | 137.7 | 195.4 | 240.0 | 294.5 | 303.1 |
| 1990 | 1.3 | 3.5 | 16.4 | 45.8 | 70.9 | 103.1 | 140.0 | 186.3 | 223.6 | 265.3 | 297.6 |
| 1991 | 1.0 | 3.7 | 15.5 | 49.1 | 71.8 | 106.3 | 163.4 | 189.1 | 257.0 | 286.3 | 317.7 |
| 1992 | 1.3 | 3.8 | 16.3 | 41.5 | 76.4 | 109.7 | 146.9 | 188.8 | 231.6 | 296.3 | 315.9 |
| 1993 | 0.9 | 3.1 | 14.5 | 42.7 | 75.0 | 113.6 | 148.4 | 192.7 | 244.7 | 280.0 | 314.9 |
| 1994 | 1.4 | 3.0 | 13.8 | 40.6 | 74.6 | 112.7 | 158.7 | 194.0 | 244.3 | 280.0 | 326.7 |
| 1995 | 1.3 | 3.0 | 13.7 | 40.7 | 71.7 | 103.2 | 158.6 | 198.7 | 263.6 | 290.1 | 306.2 |
| 1996 | 1.1 | 3.6 | 14.6 | 37.9 | 79.3 | 109.1 | 157.7 | 212.8 | 242.3 | 288.5 | 302.6 |
| 1997 | 1.0 | 3.4 | 15.0 | 37.1 | 72.8 | 107.0 | 161.8 | 200.7 | 258.2 | 300.9 | 295.9 |
| 1998 | 1.4 | 3.5 | 13.9 | 33.8 | 70.6 | 107.0 | 152.8 | 210.2 | 239.2 | 296.0 | 315.1 |
| 1999 | 1.3 | 4.5 | 14.0 | 34.1 | 64.7 | 106.6 | 154.8 | 216.4 | 255.6 | 298.4 | 338.1 |
| 2000 | 1.7 | 3.7 | 14.1 | 33.8 | 68.2 | 116.5 | 160.7 | 219.8 | 259.7 | 299.7 | 338.9 |
| 2001 | 1.2 | 3.9 | 13.7 | 32.1 | 62.5 | 107.2 | 163.0 | 232.2 | 279.3 | 304.4 | 350.0 |
| 2002 | 1.2 | 4.3 | 12.9 | 35.2 | 56.7 | 109.7 | 156.2 | 210.6 | 271.7 | 280.5 | 318.5 |
| 2003 | 1.1 | 3.3 | 11.6 | 34.7 | 51.5 | 100.5 | 161.2 | 218.2 | 258.3 | 303.6 | 307.0 |
| 2004 | 1.3 | 3.7 | 12.8 | 31.6 | 53.1 | 98.7 | 159.1 | 224.9 | 268.9 | 314.5 | 325.9 |
| 2005 | 1.5 | 4.0 | 12.2 | 29.7 | 56.8 | 95.9 | 147.8 | 212.1 | 272.7 | 323.3 | 319.3 |
| 2006 | 1.8 | 3.6 | 13.5 | 31.2 | 54.7 | 94.8 | 163.9 | 213.9 | 276.8 | 321.3 | 320.7 |
| 2007 | 2.4 | 4.1 | 14.0 | 33.3 | 61.6 | 89.7 | 174.6 | 220.7 | 279.5 | 305.0 | 309.1 |
| 2008 | 1.9 | 4.1 | 13.3 | 31.8 | 59.4 | 89.2 | 169.4 | 214.0 | 275.7 | 311.0 | 321.1 |
| 2009 | 2.2 | 3.9 | 14.1 | 32.1 | 49.6 | 86.7 | 136.2 | 216.2 | 277.8 | 334.1 | 327.5 |
| 2010 | 1.8 | 4.8 | 14.9 | 34.9 | 57.1 | 88.4 | 150.9 | 205.1 | 267.4 | 330.0 | 322.6 |
| 2011 | 2.9 | 5.4 | 13.3 | 32.1 | 53.1 | 83.4 | 131.6 | 213.7 | 276.5 | 325.0 | 335.0 |
| 2012 | 2.9 | 5.0 | 13.6 | 29.3 | 52.1 | 80.6 | 135.0 | 191.3 | 268.5 | 315.6 | 335.5 |
| 2013 | 2.7 | 5.7 | 14.8 | 30.1 | 50.3 | 79.9 | 124.9 | 186.9 | 257.5 | 310.4 | 308.5 |
